# Supplementary material
Source: Elsevier journal article supplement (https://www.sciencedirect.com/science/article/pii/S0210480614004136)
Supplement: mmc1 [file S0210480614004136:mmc1.docx]

| Tipo de Hospital |  |
| --- | --- |
| Grupo 1 | Hospitales pequeños con una media de menos de 150 camas, con escasa dotación de equipos de alta tecnología (EAT) y baja complejidad asistencial. |
| Grupo 2 | Hospitales generales básicos, con una media de 200 camas, peso docente reducido aunque algunos tienen docencia MIR de hasta 8 especialidades distintas, con pocos EAT y como máximo 2 servicios complejos. |
| Grupo 3 | Hospitales de Área, con una media de 500 camas (aunque con alta variabilidad), hasta 160 MIR; atiende casos de complejidad intermedia. |
| Grupo 4 | Grupo de grandes hospitales, pero más heterogéneos en términos de equipamiento, tamaño y actividad. Entre aproximadamente 500 y 1000 camas. Intensa actividad docente (más de 160 residentes médicos) con una media de 4 servicios complejos. |
| Grupo 5 | Hospitales muy grandes, con gran peso estructural y mucha actividad asistencial; más de 900 camas; un número medio en torno a 300 MIR en 36 especialidades diferentes (mínimo 17). Muy avanzados tecnológicamente, con amplia cartera de servicios complejos (al menos 5 servicios complejos). |

Anexo 1. Clasificación de hospitales del Ministerio de Sanidad, Servicios Sociales e Igualdad.
